# Supplementary material
Source: Springer Nature journal article supplement (https://www.springermedizin.de/resource/supplementary/12984_2009_214_MOESM3_ESM.pdf/9605660)

2 weeks post-injury

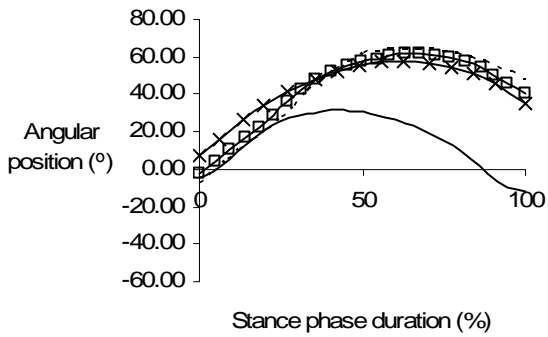

4 weeks post-injury

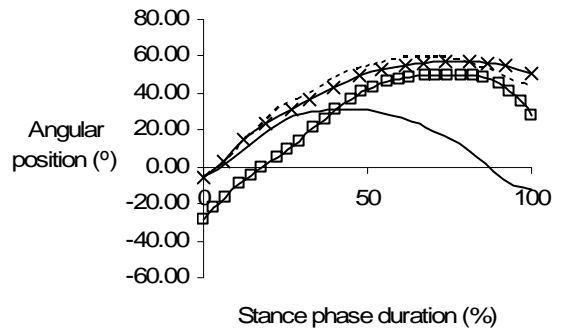

8 weeks post-injury

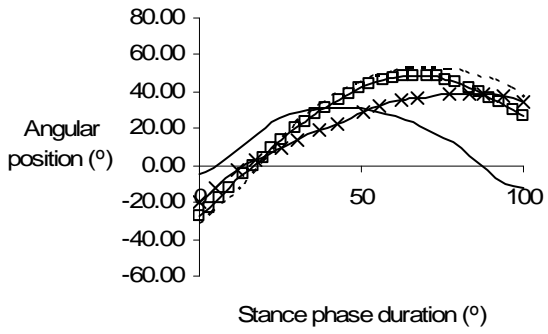

12 weeks post-injury

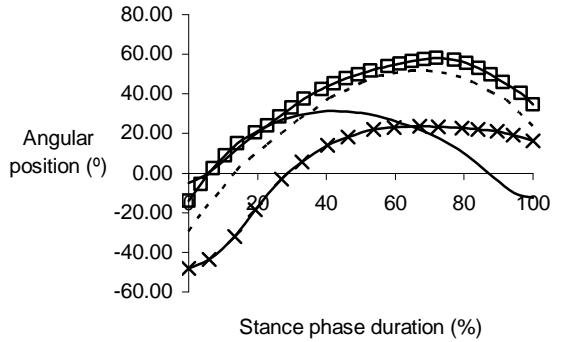

16 weeks post-injury

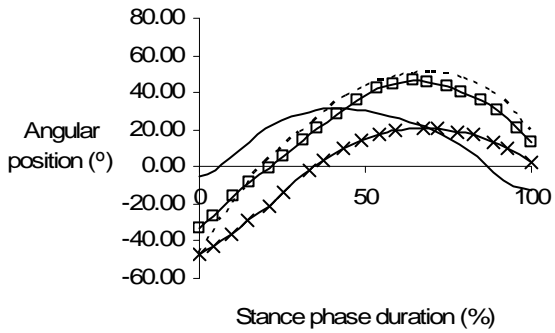

20 weeks post-injury

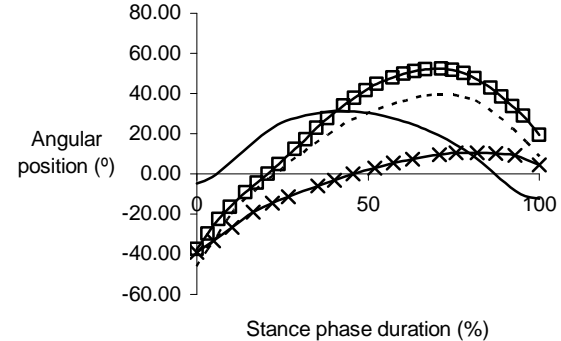

Supplement: MOESM3 [file 9605660]
